# Supplementary material for: Genetic alterations in juvenile cervical clear cell adenocarcinoma unrelated to human papillomavirus
Source: PubMed Central journal article supplement (PMC10466801; doi:10.3389/fmed.2023.1211888), 2023-08-16
Supplement: Data_Sheet_1.pdf [file Data_Sheet_1.pdf]

## *Supplementary Material*

### **Genetic Alterations in Juvenile Cervical Clear Cell Adenocarcinoma Unrelated to Human Papillomavirus**

**Yuehui Su<sup>1†</sup>, Yiming Zhang<sup>2,3†</sup>, Mengjiao Zhou<sup>1</sup>, Ruijin Zhang<sup>2,3</sup>, Siang Chen<sup>2,3</sup>, Lili Zhang<sup>2</sup>, Hao Wang<sup>2,3</sup>, Dongdong Zhang<sup>2</sup>, Ting Zhang<sup>1</sup>, Xinqiang Li<sup>1</sup>, Chunyan Zhang<sup>1</sup>, Bingjie Wang<sup>1</sup>, Shuyu Yuan<sup>1</sup>, Mengzhuo Zhang<sup>1</sup>, Yingying Zhou<sup>1</sup>, Lili Cao<sup>1</sup>, Mengzhen Zhang<sup>1\*</sup> and Jianjun Luo<sup>2,3,4\*</sup>**

<sup>1</sup>Department of Gynecology, First Affiliated Hospital of Zhengzhou University, Zhengzhou, China

<sup>2</sup>Key Laboratory of RNA Biology, Institute of Biophysics, Chinese Academy of Sciences, Beijing, China

<sup>3</sup>College of Life Sciences, University of Chinese Academy of Sciences, Beijing, China

<sup>4</sup>Key Laboratory of Epigenetic Regulation and Intervention, Chinese Academy of Sciences, Beijing, China

**\* Correspondence:**

Mengzhen Zhang\*, Jianjun Luo\*  
13683806877@163.com (M.Z.), luojianj@ibp.ac.cn (J.L.)

**Supplementary Figure and Tables**

**Supplementary Figure**

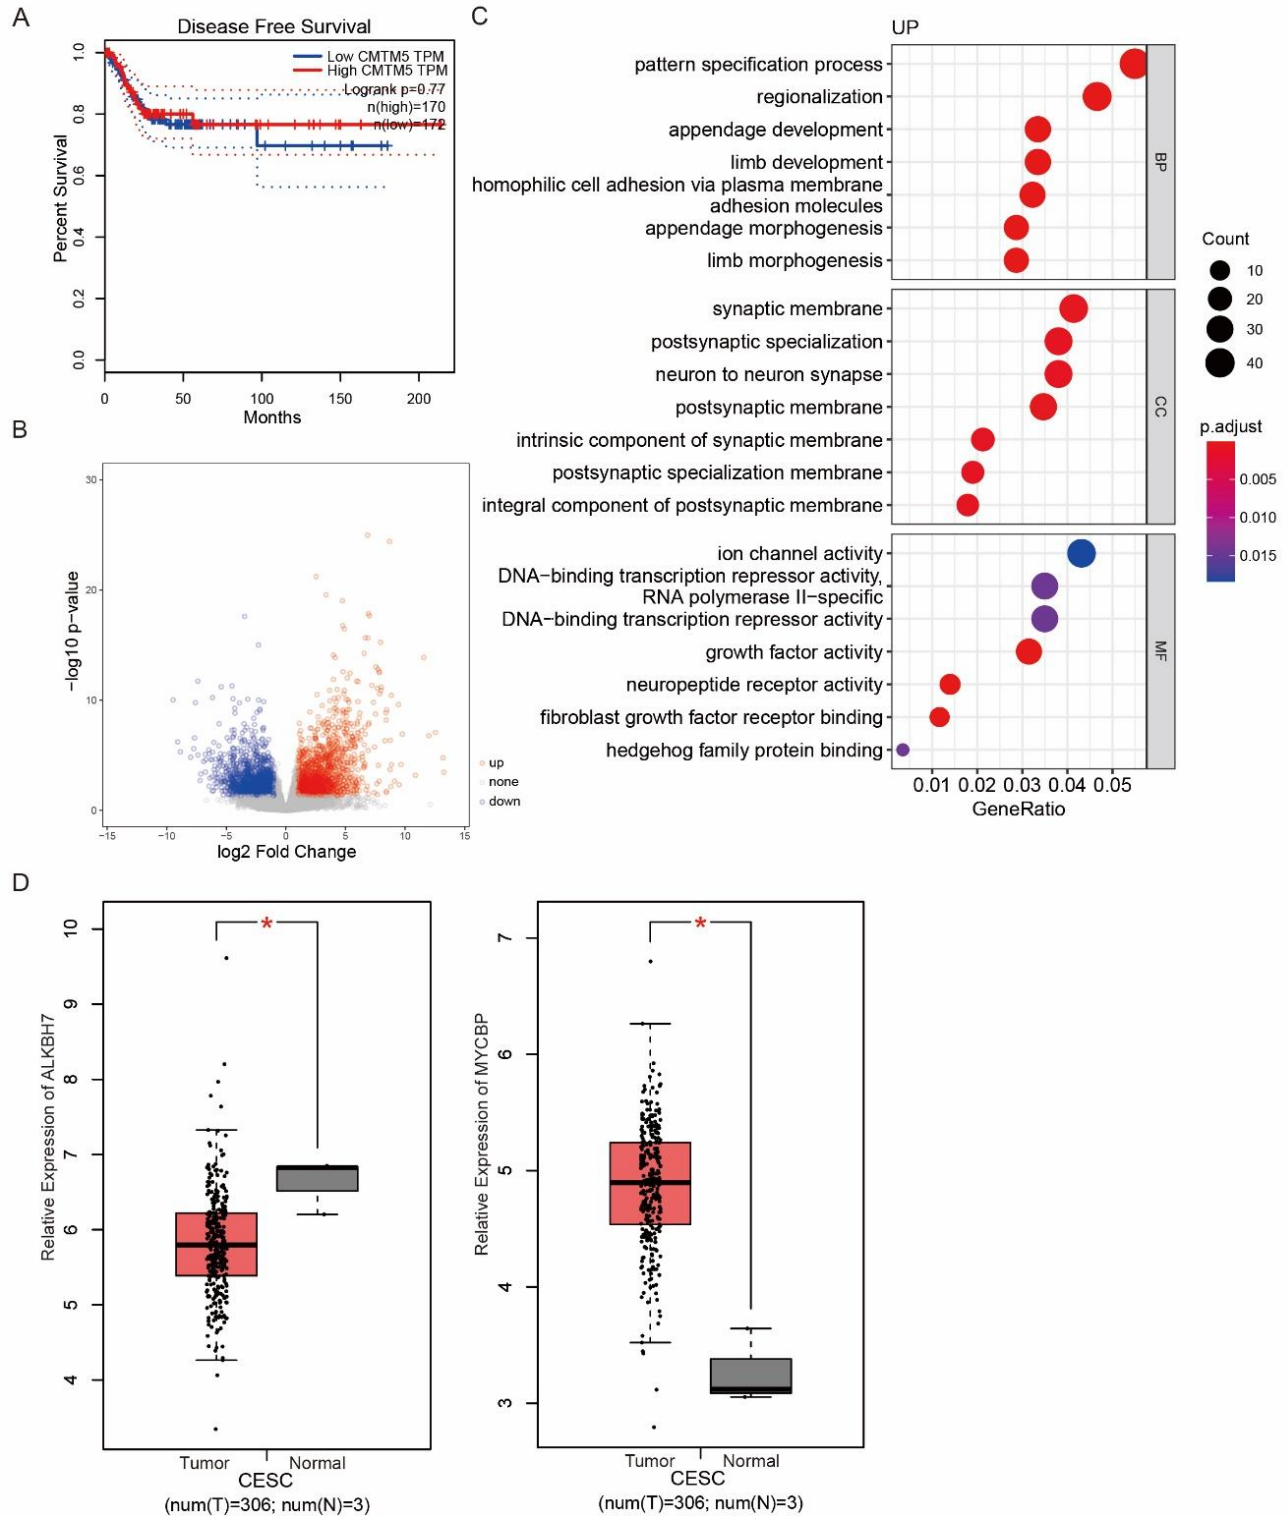

**Supplementary Figure S1.** Mutated gene CMTM5 and enrichment analysis. (A) Disease free survival (DFS) analysis based on gene expression from GEPIA. Uses Log-rank test, a.k.a the Mantel–Cox test, for hypothesis test. (B) GO enrichment analysis of the most differentially upregulated pathways. (C) Volcano plot of identified differentially expressed genes (DEGs) between HPV infected CESC and

non-HPV infected CESC group. (D) Analysis of data from TCGA and GTEx for comparison of ALKBH7 and MYCBP expression levels in cervical cancer and normal samples, the gene expression levels were shown as  $\log_2(\text{TPM}+1)$ . \* $P < 0.05$ .

## Supplementary Tables

### Supplementary Table S1

#### Diagnosis and treatment details of three clear cell carcinoma used in this study

|        |                  |                                                                                                                                                                                                                                                                                                 |
|--------|------------------|-------------------------------------------------------------------------------------------------------------------------------------------------------------------------------------------------------------------------------------------------------------------------------------------------|
| Case 1 | Age              | 14                                                                                                                                                                                                                                                                                              |
|        | Initial symptoms | Irregular vaginal bleeding for more than 1 year.                                                                                                                                                                                                                                                |
|        | Diagnosed        | MRI: Cervical cancer involving the vagina.<br>Pathology: Cervical clear cell carcinoma.                                                                                                                                                                                                         |
|        | Treatment        | Hysteroscopy + vaginal tumor resection was performed, and 3 courses of PT were given after surgery: paclitaxel + nedaplatin, followed by radical cervical cancer surgery, and 28 postoperative radiotherapy sessions, including 6 sessions of cisplatin 50mg sensitizing radiotherapy.          |
|        | Notes            | NA                                                                                                                                                                                                                                                                                              |
|        | Prognosis        | Four months after the operation, re-examination of CT considered pulmonary metastasis, and died one year after the operation.                                                                                                                                                                   |
| Case 2 | Age              | 6                                                                                                                                                                                                                                                                                               |
|        | Initial symptoms | Vaginal discharge, vaginal bleeding.                                                                                                                                                                                                                                                            |
|        | Diagnosed        | MRI: cervical solid mass. Pathology: Cervical clear cell carcinoma.                                                                                                                                                                                                                             |
|        | Treatment        | Hysteroscopic resection of cervical tumor was performed, followed by PT regimen: 4 courses of docetaxel + oxaliplatin.                                                                                                                                                                          |
|        | Notes            | After 2 years of recurrence, "laparoscopic hysterectomy + bilateral adnexectomy + pelvic lymph node dissection was performed, and the PT regimen was given 6 times of chemotherapy after surgery: docetaxel + lobaplatin.                                                                       |
|        | Prognosis        | No recurrence was found in PET-CT 4 years after operation.                                                                                                                                                                                                                                      |
| Case 3 | Age              | 14                                                                                                                                                                                                                                                                                              |
|        | Initial symptoms | Vaginal bleeding.                                                                                                                                                                                                                                                                               |
|        | Diagnosed        | MRI: Upper vagina and cervical space occupying, consider malignant lesions. Pathology: Malignant neoplasm of vaginal growth, prone to cancer, immunohistochemistry suggests the possibility of clear cell carcinoma.                                                                            |
|        | Treatment        | Hysteroscopy + vaginal tumor resection, and postoperative PT program: docetaxel intravenous infusion + lobaplatin for 3 courses of treatment, followed by "laparoscopic uterus + bilateral adnexectomy + pelvic lymph node dissection", 6 courses of PT regimen were given after the operation. |
|        | Notes            | NA                                                                                                                                                                                                                                                                                              |
|        | Prognosis        | 2 years after operation, PET-CT examination showed no abnormality.                                                                                                                                                                                                                              |

**Supplementary Table S2****Genes identified with genetic alterations from patients**

| Patient-1    | Patient-2 | Patient-3   |
|--------------|-----------|-------------|
| ALKBH7       | BCL2L12   | ASAP1-IT1   |
| APOE         | CDK5R1    | BAP1        |
| ARFIP2       | CT45A6    | CENPX       |
| ASAP1-IT2    | CT45A7    | CMTM5       |
| ATP6AP1      | F8A2      | CXorf49B    |
| CBR1         | F8A3      | DDT         |
| CMTM5        | KATNBL1P6 | GSTT1-AS1   |
| DNAJB7       | MIR1184-1 | HIST2H2AA3  |
| EGOT         | MIR1184-2 | LOC554249   |
| EID1         | MIR1184-3 | MIR567      |
| ENKD1        | MIR147B   | NTHL1       |
| H2AFZ        | MIR6770-1 | PDF         |
| HERC2P4      | MIR6770-2 | SNHG3       |
| HNRNPUL2     | MIR6770-3 | SNORD116-10 |
| HS3ST5       | RPA4      |             |
| HTRA2        | RPL36AL   |             |
| IFRD2        | SMCO3     |             |
| KDM5D        | U2AF1     |             |
| KIAA0754     | USP17L3   |             |
| LINC00216    |           |             |
| LINC01957    |           |             |
| LOC100128361 |           |             |
| LOC100129046 |           |             |
| LOC100131496 |           |             |
| LOC100132356 |           |             |
| LOC105379192 |           |             |
| LOC148696    |           |             |
| LOC401052    |           |             |
| LOC729739    |           |             |
| LRRC24       |           |             |
| LXN          |           |             |
| MFSD3        |           |             |
| MIR1293      |           |             |
| MIR1908      |           |             |
| MIR3131      |           |             |
| MIR3671      |           |             |
| MIR4632      |           |             |
| MIR497       |           |             |
| MIR548AK     |           |             |

|            |  |  |
|------------|--|--|
| MIR638     |  |  |
| MIR663A    |  |  |
| MIR6724-1  |  |  |
| MIR6724-2  |  |  |
| MIR6724-3  |  |  |
| MIR6726    |  |  |
| MIR8063    |  |  |
| MYCBP      |  |  |
| MZF1       |  |  |
| NAT6       |  |  |
| NSA2       |  |  |
| OR4F16     |  |  |
| OR4F3      |  |  |
| PPP3CB-AS1 |  |  |
| RASSF1-AS1 |  |  |
| RNF207     |  |  |
| RNU105B    |  |  |
| RPL13AP6   |  |  |
| RRS1       |  |  |
| S100G      |  |  |
| SCARNA9L   |  |  |
| SLC39A7    |  |  |
| SNORA24    |  |  |
| SNORA67    |  |  |
| SNORA71D   |  |  |
| SNORA72    |  |  |
| SNORA9B    |  |  |
| SNORD88A   |  |  |
| SPINK13    |  |  |
| STX18-IT1  |  |  |
| SULT1A3    |  |  |
| SULT1A4    |  |  |
| SYP-AS1    |  |  |
| TCEB3C     |  |  |
| TLX1       |  |  |
| TMEM14EP   |  |  |
| TMEM258    |  |  |
| TMEM88     |  |  |
| TOP1P1     |  |  |
| TPRG1-AS2  |  |  |
| TSPEAR-AS2 |  |  |
| TTY10      |  |  |
| TTY4       |  |  |
| TUSC2      |  |  |
| U2AF1      |  |  |

|           |  |  |
|-----------|--|--|
| USP32P3   |  |  |
| ZNF32-AS1 |  |  |

**Supplementary Table S3****Mutation point identified within CMTM5 from patients**

|           | Chrom | Pos      | Ref | Alt | Symbol |
|-----------|-------|----------|-----|-----|--------|
| patient-1 | chr14 | 23379102 | C   | T   | CMTM5  |
| patient-3 | chr14 | 23379708 | A   | T   | CMTM5  |

**Supplementary Table S4****Genes related to non-HPV infection, have mutation identified from patient-1**

| GS.hpv     | p.GS.hpv | gene_name  |
|------------|----------|------------|
| 0.1791839  | 2.93E-02 | ALKBH7     |
| -0.222192  | 6.64E-03 | EGOT       |
| 0.2452161  | 2.67E-03 | HS3ST5     |
| 0.2581975  | 1.53E-03 | MFSD3      |
| 0.606546   | 3.08E-16 | MIR3131    |
| -0.1933429 | 1.86E-02 | MYCBP      |
| 0.2587439  | 1.50E-03 | MZF1       |
| 0.1653889  | 4.46E-02 | RASSF1-AS1 |
| -0.2906243 | 3.39E-04 | RNF207     |
| 0.1625284  | 4.84E-02 | RPL13AP6   |
| 0.1629806  | 4.78E-02 | RRS1       |
| -0.1956148 | 1.72E-02 | TMEM14EP   |
| 0.2473505  | 2.44E-03 | TSPEAR-AS2 |
| 0.1887228  | 2.16E-02 | TUSC2      |
| 0.2311582  | 4.70E-03 | USP32P3    |
| 0.2175325  | 7.91E-03 | ZNF32-AS1  |

**Supplementary Table S5****Genes related to non-HPV infection, have mutation identified from patient-3**

| GS.hpv    | p.GS.hpv | gene_name   |
|-----------|----------|-------------|
| 0.168485  | 4.07E-02 | PDF         |
| 0.2065406 | 1.18E-02 | SNHG3       |
| 0.4012452 | 4.33E-07 | SNORD116-10 |

**Supplementary Table S6**

**Genes harboring point mutation ratio across the primary tissue types that are curated by COSMIC.**

|                             | ALKBH7 | MYCBP | MZF1  | RNF207 | RRS1  | TUSC2 |
|-----------------------------|--------|-------|-------|--------|-------|-------|
| Cervix                      | 1.20%  | 0.30% | 1.80% | 1.20%  | 0.90% | 0.60% |
| Endometrium                 | 1.02%  | 1.40% | 2.42% | 3.05%  | 1.02% | 0.76% |
| Biliary tract               | 0.12%  | 0.46% | 0.46% | 1.39%  | 0.12% | 0.12% |
| Breast                      | 0.25%  | 0.44% | 0.76% | 0.94%  | 0.22% | 0.11% |
| Haematopoietic and lymphoid | 0.13%  | 0.12% | 0.31% | 0.25%  | 0.12% | 0.08% |
| Large intestine             | 0.91%  | 0.49% | 3.06% | 2.60%  | 0.98% | 0.28% |
| Liver                       | 0.44%  | 0.53% | 1.27% | 1.09%  | 0.35% | 0.31% |
| Lung                        | 0.44%  | 0.18% | 1.38% | 1.34%  | 0.69% | 0.17% |
| Oesophagus                  | 0.13%  | 0.19% | 0.81% | 0.38%  | 0.06% | 0.31% |
| Pancreas                    | 0.30%  | 0.20% | 1.09% | 0.60%  | 0.10% | 0.05% |
| Prostate                    | 0.35%  | 0.35% | 0.65% | 1.01%  | 0.10% | 0.10% |
| Skin                        | 0.84%  | 0.84% | 1.85% | 2.13%  | 0.62% | 0.50% |
| Stomach                     | 0.70%  | 0.21% | 1.96% | 1.82%  | 1.33% | 0.28% |
| Thyroid                     | 0.48%  | 0.77% | 0.71% | 1.92%  | 0.87% | 0.58% |

**Supplementary Table S7**

**Associations of module and non-HPV infected CESC**

| Row.names       | correlation | pvalue   |  |  |  |
|-----------------|-------------|----------|--|--|--|
| MEantiquewhite2 | 0.073744    | 0.373066 |  |  |  |
| MEantiquewhite4 | -0.01546    | 0.852057 |  |  |  |
| MEbisque4       | 0.034738    | 0.675104 |  |  |  |
| MEblack         | 0.454986    | 6.26E-09 |  |  |  |
| MEblue          | 0.155532    | 0.059081 |  |  |  |
| MEblue2         | -0.00857    | 0.917671 |  |  |  |
| MEblue4         | 0.021027    | 0.799755 |  |  |  |
| MEblueviolet    | -0.02763    | 0.738861 |  |  |  |
| MEbrown         | -0.17721    | 0.031191 |  |  |  |
| MEbrown2        | 0.019651    | 0.81261  |  |  |  |
| MEbrown4        | -0.0282     | 0.733711 |  |  |  |
| MEcoral         | -0.01846    | 0.823783 |  |  |  |
| MEcoral1        | -0.01133    | 0.891263 |  |  |  |
| MEcoral2        | -0.00653    | 0.937213 |  |  |  |
| MEcoral3        | -0.0068     | 0.934629 |  |  |  |
| MEcyan          | 0.013557    | 0.870094 |  |  |  |
| MEdarkgreen     | -0.21327    | 0.009254 |  |  |  |
| MEdarkgrey      | -0.35118    | 1.21E-05 |  |  |  |
| MEdarkmagenta   | 0.056367    | 0.496213 |  |  |  |

|                   |          |          |  |  |
|-------------------|----------|----------|--|--|
| MEdarkolivegreen  | 0.030744 | 0.710688 |  |  |
| MEdarkolivegreen2 | -0.02315 | 0.780073 |  |  |
| MEdarkolivegreen4 | -0.00295 | 0.971659 |  |  |
| MEdarkorange      | 0.031586 | 0.703129 |  |  |
| MEdarkorange2     | 0.028866 | 0.727642 |  |  |
| MEdarkred         | -0.00352 | 0.966179 |  |  |
| MEdarkseagreen3   | -0.00155 | 0.985128 |  |  |
| MEdarkseagreen4   | -0.01632 | 0.843883 |  |  |
| MEdarkslateblue   | -0.02344 | 0.777369 |  |  |
| MEdarkturquoise   | 0.299009 | 0.000223 |  |  |
| MEdarkviolet      | -0.00998 | 0.904154 |  |  |
| MEdeppink         | -0.03043 | 0.713545 |  |  |
| MEfirebrick3      | -0.02001 | 0.809231 |  |  |
| MEfirebrick4      | -0.02594 | 0.754325 |  |  |
| MEfloralwhite     | 0.185723 | 0.023824 |  |  |
| MEgreen           | 0.005695 | 0.94523  |  |  |
| MEgreenyellow     | 0.001569 | 0.984904 |  |  |
| MEgrey            | 0.056334 | 0.496462 |  |  |
| MEgrey60          | 0.146636 | 0.075338 |  |  |
| MEhoneydew        | 0.012691 | 0.878332 |  |  |
| MEhoneydew1       | 0.020799 | 0.80188  |  |  |
| MEindianred3      | 0.014246 | 0.863555 |  |  |
| MEindianred4      | -0.00814 | 0.921759 |  |  |
| MEivory           | -0.0029  | 0.972117 |  |  |
| MElavenderblush1  | 0.010647 | 0.897805 |  |  |
| MElavenderblush2  | 0.017002 | 0.837491 |  |  |
| MElavenderblush3  | 0.029103 | 0.725495 |  |  |
| MElightblue4      | -0.02079 | 0.801977 |  |  |
| MElightcoral      | -0.00065 | 0.993734 |  |  |
| MElightcyan       | 0.434975 | 3.31E-08 |  |  |
| MElightcyan1      | -0.01841 | 0.824274 |  |  |
| MElightgreen      | -0.01644 | 0.842788 |  |  |
| MElightpink2      | 0.005924 | 0.943036 |  |  |
| MElightpink3      | -0.01462 | 0.859996 |  |  |
| MElightpink4      | -0.00317 | 0.969505 |  |  |
| MElightslateblue  | 0.008553 | 0.917826 |  |  |
| MElightsteelblue  | -0.04241 | 0.60877  |  |  |
| MElightsteelblue1 | -0.01738 | 0.833934 |  |  |
| MElightyellow     | -0.00334 | 0.967855 |  |  |
